# Supplementary material for: Genome-wide identification and expression analysis of the OSC gene family in Platycodon grandiflorus
Source: PeerJ. 2024 Oct 28;12:e18322. doi: 10.7717/peerj.18322 (PMC11639181; doi:10.7717/peerj.18322)
Supplement: Table S1 [file peerj-12-18322-s001.xlsx]

## Sheet: Sheet1
Table S1. The Prediction of amino acid hydrophobicity of PgOSC protein
		GWHTARYT001935										GWHTARYT001941
		GWHTARYT003673										GWHTARYT003685
		GWHTARYT013985										GWHTARYT020183
		GWHTARYT020185										GWHTARYT020187
		GWHTARYT020223										GWHTARYT023351
		GWHTARYT036535										GWHTARYT039321
		GWHTARYT039323										GWHTARYT039333
		GWHTARYT039335
