# Supplementary material for: Genome-wide identification and expression analysis of the OSC gene family in Platycodon grandiflorus
Source: PeerJ. 2024 Oct 28;12:e18322. doi: 10.7717/peerj.18322 (PMC11639181; doi:10.7717/peerj.18322)
Supplement: Table S2 [file peerj-12-18322-s002.xlsx]

## Sheet: Sheet1
Table S2 The list of proteins and CDS sequences of PgOSC
Gene ID	Protein sequence	CDS sequence
GWHTARYT001935	MWKLKIAEGNGPYLYSTNNFVGRQIWEFDPDAGTPEEREKVEKAREHFRTNRRQGIHGCG DLLMRMQLIKENGIDLLSIPPVRLGEGENVNYEAVTTAVKKALRLNRAIQAKDGHWPAEN TGPLFFTPPFIIAFYISGTINTILRQKHKTEMIRYIYNHQNDDGGWGFYIGGHSTMIGSA LSYVALRLLGEGPDGGNGAVARGRKWILNHGGACSIPSWGKTYLSVLGVYEWEGCNPLPP EFWLFPSALPYHPAKMWCYCRTTYIPMSYLYGKKYHGPITDLVLSLRQEIHPIAYESIDW NRQRHNCCKEDLYYPHTIVQDLLWDTLHYLSEPIITRWPFNKIRERGIRRTVELMRYGAE ETRYITLGCVEKGLQMMCWWAENPNGVEFKHHL…	ATGTGGAAACTGAAGATAGCAGAAGGCAATGGTCCATATTTATATAGCACGAACAACTTTGTTGGGAGGCAAATTTGGGAGTTTGATCCCGATGCCGGAA CACCAGAAGAGAGAGAAAAGGTTGAGAAGGCCCGTGAACATTTCCGGACTAATCGAAGACAAGGTATTCATGGCTGTGGTGATTTGCTCATGCGCATGCA GCTTATCAAGGAAAACGGGATAGATCTTCTGAGCATACCACCGGTGAGGCTCGGAGAGGGAGAAAATGTGAATTATGAAGCTGTTACGACGGCCGTGAAG AAAGCGCTTCGATTGAACCGTGCAATCCAAGCTAAGGACGGCCACTGGCCTGCTGAAAATACTGGCCCTTTGTTTTTCACCCCTCCCTTTATAATC…
GWHTARYT001941	MWKLKIAEGNDPYLYSTNNFVGRQIWEFDPDAGTPEEREEVEKVREHFRTKRRQGVHPCG DLLMRMQLIKENGIDLVSIPPVRLGEDENVNYEAVTTAVKKALRLHRAIQAKDGHWPAEN SGPMFFTPPLIIALYISGAIDTILREEHKVEMIRYIYNHQNDDGGWGFYIEGHSTMIGSA LSYVALRLLGEGPDHGNGAVARGRKWILDHGGATSIPSWGKTYLSVLGVYEWEGCNPIPP EFWLFPAAMPYHPAKMWCYCRTTYMPMSYLYGKKYHGPITDLVLSLRREIHSIAYEDIDW NKQRHNCCKEDLYYPHTFVQDLLWNTLHYVSEPIITRWPFKKIRERGIQKAVELMRYGAQ ESRYITIGCVEKSLQMMCWWAENPNGKEFKHHL…	ATGTGGAAGCTAAAGATAGCCGAAGGGAATGATCCATACTTGTATAGCACAAACAACTTTGTTGGCAGGCAAATTTGGGAGTTTGATCCCGATGCCGGAA CACCAGAAGAGAGAGAAGAGGTCGAGAAAGTCCGTGAACATTTCCGGACTAAACGAAGACAAGGTGTTCATCCCTGTGGGGATTTGCTTATGCGCATGCA ACTTATCAAGGAAAACGGAATAGATCTTGTGAGCATACCACCGGTGAGGCTCGGAGAAGATGAAAATGTGAATTATGAAGCTGTTACGACTGCAGTGAAA AAAGCTCTTCGATTGCACCGTGCGATTCAAGCTAAGGACGGCCACTGGCCTGCGGAAAATTCTGGCCCCATGTTCTTTACCCCTCCTCTTATCATC…
GWHTARYT003673	MWKLKIAEGKGPYLFSTNNFVGRQFWEFDPDAGTDEERQAVENARLQYEKNRKLLPAADL LMQMQLVKENGMEELLSLPPVRLGENEQVNIEAVTTAVKKGLRMLRALQSSDGHWPAESA GPLFFTPPLLIALYISGAIDTFLTKEHKKELIRYLYHHQNEDGGWGFYSGGHSTMLGSAL NYVSLRMLGEAAGNGAIGRGQKWILDHGGALGIPSWGKIYFSVLGVYEWEGCNPVPPEFW LFPDIFPFHPAKLWCYSRTAYMPMSYLYAKKYHGKITDLVLSMRNELYPIPYAEINWNAQ RHYCCQEDLYYPHTYVQDLLWNCLHYVSEPIMNRWPFTKLRERAIKRAVDLMRYESEETR YMTIGCVSKSLQMMCWWAENPDGIEFKRHLARV…	ATGTGGAAGCTGAAGATAGCAGAAGGCAAAGGCCCGTATTTGTTTAGCACAAACAACTTTGTTGGGAGACAATTCTGGGAATTTGACCCTGATGCTGGCA CAGATGAGGAGCGACAAGCGGTTGAAAATGCCCGTCTCCAATATGAGAAAAACCGCAAACTCTTGCCCGCTGCTGATTTGCTCATGCAAATGCAGCTTGT CAAGGAAAATGGGATGGAGGAACTTCTAAGCTTACCACCGGTGAGATTAGGAGAAAATGAACAAGTGAACATTGAAGCTGTCACCACAGCTGTCAAGAAA GGCCTTCGAATGCTTCGGGCTCTCCAAAGTTCAGATGGCCATTGGCCTGCTGAAAGTGCTGGCCCTCTCTTTTTTACTCCTCCCCTGCTTATTGCC…
GWHTARYT003685	MWKLKIAEGKGPYLFSTNNFVGRQFWEFDPDAGTDEERQAVENARLHYEKNRKLMPSADL LMQMQLVKENGMEELLSLPPVRLGEKEQVNYEAVTTAVKKGLRMLRALQGPDGHWPAESA GPHFFTPPLLIALYISGAIDTHLTKEHKKEMIRYIYNHQNEDGGWGFYSGGHSTMLGSAL NYVSLRLLGEAAGDGAIARGQKWILDHGGALGIPSWGKIYFSVLGVYEWEGCNPVPPEFW LFPDAFPFHPANMWCYCRTAYMPMSYLYAKKYHGTITDLVLSLRNELYPLPYAEINWNAQ RHYCCQEDLYYPHTSVQDLLWNSLHYVSEPIMKLWPFTKLRDIAVKRAVDLMRVESEETR YMTIGCVSKSLQMMCWWAEKPNGDEFKYHLARV…	ATGTGGAAGCTGAAGATAGCAGAAGGCAAAGGCCCATATTTGTTTAGCACCAACAACTTTGTTGGGAGACAATTCTGGGAATTTGACCCTGATGCTGGCA CAGATGAGGAGCGACAAGCAGTCGAAAACGCCCGTCTTCATTATGAGAAAAACCGCAAACTCATGCCCTCTGCGGATTTGCTCATGCAAATGCAGCTTGT CAAGGAAAATGGGATGGAGGAACTTCTAAGCTTACCACCGGTGAGATTAGGAGAAAAAGAGCAAGTGAACTATGAAGCTGTCACCACAGCCGTGAAGAAA GGGCTTCGAATGCTTCGGGCTCTCCAAGGTCCAGACGGTCATTGGCCTGCTGAAAGTGCTGGCCCTCACTTTTTTACTCCTCCGTTGCTTATTGCC…
GWHTARYT013985	MWKLRVGKGKGKGEGEWLFSTNNFVGRQFWEFESECGTPQELAQLHKARSTYHQNRFHVK PSSDSLNHLQLIKENGIDLNLIPKVIVGDDQQVSREVATTALRKAVRFVSATQAHDGHWP SECSGPLFFTPLLIIFHYVSGTMNSVLSSEHQKEILRYIYNHQNKDGGWGFHVEGHSIML STAFNYVALRLLGQETDEGSVWKARKWILDHGGLTMIPSWGKMTLSFLGVYEWSGCNPVP PELWLLPSYLPFHPGQICCFCREVSKPLSYLYGKKFVGKITDLILSLREELYTKPYDKIN WNKARRLCLKEDLYCPHSMVQDLIWDALYYVGETLLSYSPFSKLREKALRTTIQHIHYED VNSRYLTIACIPKIYHMMACWAEDQNPNSSVFK…	ATGTGGAAGCTAAGGGTGGGGAAAGGGAAAGGGAAAGGGGAAGGGGAATGGCTTTTTAGCACCAACAACTTTGTTGGGAGGCAGTTTTGGGAGTTTGAGA GTGAGTGTGGAACCCCTCAAGAGCTTGCTCAACTCCACAAAGCTAGGTCTACTTACCATCAAAATCGTTTCCATGTCAAGCCCAGCAGTGACTCCCTAAA CCATCTCCAGCTTATTAAAGAAAACGGAATTGATCTAAACTTAATACCAAAGGTGATTGTGGGAGACGACCAACAAGTTTCAAGGGAAGTAGCAACAACT GCTCTGCGCAAAGCGGTTCGATTTGTTTCAGCAACTCAAGCACACGATGGCCATTGGCCATCTGAATGTTCCGGCCCCTTGTTTTTTACACCTTTG…
GWHTARYT020183	MWKLRIAQGENEPYLYSTNNYVGRETWEFDPDGGTPEERAEVEQARLHFWNNRHQVKPSS DLLWRQQFLREKNFEQTIPRVKVEDGEEITYEKTTTTLRRAVNFFVALQASDGHWPAENT GPLFFLPPLVMCLYITGHLNTIFPAEHRQEILRYIYCHQNEDGGWGLHIESHSTMFCTTL SYICMRILGEGPDGGQHNACARARKWILDHGSVTAIPSWGKTWLSILGVYEWSGSNPMPP EFWILPSFLPMHPAKMWCYCRLVYMPMSYLYGKKFVGSITPLVLQLRKELYAQPYNEINW KKTRHVCAKEDLYYPHPLIQDLMWDFLYNFTEPFLNRWPLSKLREKALQTTMKHIHYEDE NSRYITIACVEKVLCMLACWVEDPNGDYFKKHL…	ATGTGGAAGCTGAGGATAGCACAAGGTGAGAATGAACCTTACTTGTACAGTACAAACAACTATGTGGGAAGAGAAACGTGGGAGTTTGATCCTGATGGTG GCACCCCCGAAGAAAGAGCCGAGGTTGAACAAGCTCGTCTCCATTTCTGGAACAACCGTCATCAAGTTAAGCCTAGCAGTGACCTTCTTTGGCGTCAACA GTTTCTAAGAGAGAAAAACTTCGAGCAAACAATACCTCGAGTGAAGGTAGAGGATGGGGAAGAAATTACGTACGAAAAAACCACAACCACATTGAGGAGG GCTGTCAACTTCTTCGTAGCCTTGCAAGCTAGCGATGGCCACTGGCCTGCTGAAAATACTGGTCCTTTATTCTTCCTTCCACCCCTGGTCATGTGC…
GWHTARYT020185	MWKLKIAQGGNDPYLYSTNNYVGRQTWEFDPDGGTPEERAEVEQARLHFWNNRHQVKPSS DLLWRQQFLREKKFEQTIPQVKVEDGEEITYERATTTLRRAVSFFAALQASDGHWPAENA GPLFFLPPLVMCLYITGHLDTIFPAEHRKEILRYIYCHQNEDGGWGLHIEGHSTMFCTAL SYICMRILGEGPDGGQHNACTRARKWILDHGSVTAIPSWGKTWLSILGVYEWSGNNPMPP EFWILPSFLPMHPAKMWCYCRMAYMPMSYLYGKKIVGSITPLVLQLREELYSQPYNEINW KKTRHVCAKEDLYYPHPLIQDLMWDCLYSFIEPLLNRWPLSKLREKALQTTMKHIHYEDE NSRYITIGGVEKVLCMLACWVEDPDGDYFKKHL…	ATGTGGAAGCTGAAGATAGCACAAGGTGGGAATGACCCTTACTTGTACAGTACAAACAACTATGTGGGAAGACAAACGTGGGAGTTTGATCCTGATGGTG GCACCCCTGAAGAAAGAGCCGAGGTTGAACAAGCTCGTCTCCATTTCTGGAACAACCGTCATCAAGTTAAGCCTAGCAGTGACCTTCTTTGGCGTCAACA GTTTCTAAGAGAGAAAAAGTTTGAGCAAACAATACCTCAAGTGAAGGTAGAGGATGGGGAAGAAATCACTTACGAAAGAGCCACAACCACATTGAGGAGG GCTGTCAGCTTCTTTGCAGCTTTGCAGGCTAGTGATGGCCACTGGCCTGCTGAAAATGCTGGCCCTTTGTTCTTCCTTCCACCTCTCGTCATGTGC…
GWHTARYT020187	MWKLRIAQGGNDPYLYSTNNYVGRQTWEFDPDGGTPEERAEVEQARLHFWKNRHQLKPSS DLLWRQQFLREKNFKQTIPRVKVEDGEEITYEKTTTTLRRAVNFFVALQASDGHWPAENA GPLFFLPPLVMCLYITGHLNSIFPAEHRQEILRYIYCHQNEDGGWGLHIEGHSTMFCTAL SYICMRILGEGPDGGQHNACARARKWILDHGSATTIPSWGKTWLSILGVYEWSGSNPMPP EFWILPSFLPMHPAKMWCYCRLVYMPMSYLYGKKFVGSITPLVLQLRKELYAQPYNEINW KKTRHVCAKEDLYYPHPLIQDLMWDCLYNFTEPFLNRWPLSKLREKALQTTMKHIHYEDE NSRYITIGCVEKVLCMLACWVEDPNGDYFKKHL…	ATGTGGAAGCTGAGGATAGCACAAGGTGGGAATGACCCTTACTTGTACAGTACAAACAACTATGTGGGAAGACAAACGTGGGAGTTTGATCCTGATGGTG GCACCCCTGAAGAAAGAGCCGAGGTTGAACAAGCTCGGCTCCATTTCTGGAAAAACCGTCACCAACTTAAGCCTAGCAGTGACCTTCTTTGGCGTCAACA GTTTCTAAGAGAGAAAAACTTCAAGCAAACAATACCTCGAGTGAAGGTTGAGGATGGGGAAGAAATTACATACGAAAAAACCACAACCACATTGAGGAGG GCTGTCAACTTCTTCGTAGCCTTGCAAGCTAGCGATGGCCACTGGCCTGCTGAAAATGCTGGTCCTTTGTTCTTCCTTCCACCCCTGGTCATGTGC…
GWHTARYT020223	MWKLRIAEGGKEPYLYSTNNYVGRQTWEFDPDGGTPEERAEVERARLHFWNNRYQVKPSG DLLWRQQFLKEKNFEQTMPQVKVEDGEEITYEKATTTLRRAVNFFVALQASDGHWPAENA GPLFFLPPLVMCLYITGHLDTIFPAEHRKEILRYIYCHQNEDGGWGLHIEGHSTMFCTAL SYICMRILGEGPDGGQNNACTRARKWILDHGSVTAIPSWGKTWLSILGVYEWSGSNPMPP EFWILPCFLPMHPAKMWCYCRMVYMPMSYLYGKKFVGSITSLVLQLREELYTQPYNEINW KKSRHVCAKEDLYYPHPLIQDLMWDSMYIFTEPFLNRWPLNKVREKALQKTMKHIHYEDE NSRYITIGCVEKVLCMLACWVEDPNGDYFKKHL…	ATGTGGAAGCTGAGGATAGCAGAAGGTGGGAAGGAACCTTACTTGTACAGTACAAACAATTATGTGGGGAGACAAACGTGGGAGTTTGATCCAGATGGTG GGACCCCTGAAGAAAGAGCCGAGGTTGAACGAGCTCGACTCCATTTCTGGAACAACCGTTACCAAGTTAAGCCTAGCGGTGACCTTCTTTGGCGTCAACA GTTTCTAAAAGAGAAAAACTTCGAGCAAACAATGCCTCAAGTGAAGGTAGAGGATGGGGAAGAAATCACATACGAAAAAGCCACAACCACATTGAGGAGG GCTGTAAACTTCTTTGTAGCCTTGCAAGCTAGCGATGGCCACTGGCCTGCTGAAAATGCTGGTCCTTTGTTCTTTCTTCCACCCCTGGTCATGTGC…
GWHTARYT023351	MWKLKVADGGNDPYIYSTNNYVGRQIWEFDPDYGTPEAKAEVEQARQDFWNNRYDIKPSG DVLWRMQFLREKNFEQKIPQVKIEDDEEITYEKATTTLKRAVHFFSALQADDGHWPAENA GPLFFLPPLVMCTYITGHLNSVFPAEHRKEILRYLYCHQNEDGGWGFHIEGHSTMFCTTL SYICMRILGEGPDGGLNNACARARKWILDHGSVTYIPSWGKTWLSILGVYEWSGSNPMPP EFWILPSFLPMHPAKMWCYCRMVYMPMSYLYGKRFVGPITPLILQLREELFAEPYDQINW KKTRHWCAKEDMYYPHPLIQDLMWDSLYICSEPFLTRWPFNKLIRKKALETTMKHIHYED ENSRYITIGCVEKVLCMLACWVEDPEGDYFKKH…	ATGTGGAAGCTTAAGGTGGCTGATGGTGGTAATGATCCATACATATACAGCACCAACAACTATGTGGGAAGACAGATATGGGAGTTTGATCCCGACTACG GTACCCCTGAAGCCAAAGCCGAGGTTGAGCAAGCCCGTCAAGACTTCTGGAACAACCGCTACGACATTAAGCCCAGTGGCGACGTCCTGTGGCGAATGCA GTTTCTACGAGAGAAGAACTTCGAGCAAAAAATACCACAAGTGAAGATTGAAGATGATGAAGAAATCACCTATGAGAAAGCCACAACCACATTGAAGAGG GCAGTCCACTTCTTTTCAGCATTGCAGGCTGATGACGGCCACTGGCCAGCCGAAAATGCTGGCCCGTTGTTTTTCCTTCCACCCTTGGTCATGTGC…
GWHTARYT036535	MWKLKVGVGEGEGEWLFSTNNFVGRQIWVFDSNGGTEEERQQVEKERLRYHQNRFQVRPS SDSLNHLQLIRESGIDLKILPNVKVGEEEEITREAVKTAIRKSVRYFAATQAQDGHWPSE CSGPLFFIPTLVIFLYVSGTTDSVLSSEHKKEILRYIYNHQNEDGGWGFHVEGHSVMLST ALNYVALRLLGEGTEGGPEGAVYKARRWILDHGGLTMIPSWGKMCLAFLGVYDWSGCNPV PPELWLLPSYLPFHSGRLWCYFRDTSIPFSYLYGKKAVGKITDLILSLREELYTKPYEKI NWNRARHSCLKEDIYRAHPLVQNLIWDILYYVGETIVSYWPLSKLREKALQKAISCIHWE DKNSRYLTLGNLPKSFHMMSIWAEDPNPNSNAF…	ATGTGGAAGCTTAAGGTAGGGGTAGGGGAAGGGGAAGGGGAGTGGCTGTTTAGCACCAACAACTTTGTGGGTAGGCAAATATGGGTGTTTGATAGTAATG GAGGAACCGAAGAAGAGCGTCAACAAGTTGAGAAAGAACGACTACGATATCACCAGAATCGTTTCCAAGTCAGGCCTAGCAGCGACTCTCTAAACCATCT TCAGCTTATTAGAGAAAGCGGAATTGATCTGAAGATACTACCCAACGTGAAAGTGGGAGAGGAGGAAGAAATCACAAGGGAAGCAGTAAAAACTGCCATC AGGAAATCGGTTCGATATTTTGCGGCAACTCAAGCACAAGATGGCCACTGGCCATCTGAATGTTCTGGTCCATTGTTCTTTATACCAACACTGGTA…
GWHTARYT039321	MWRLKIAEGDGAAGRGLLTTTNNHVGRQHWEFDPDAGTNEERAEVERARHYFKQNRFTFK QSSDLLMRFQLTKERPCGPIPSAIKLKETEEITEEAVTTTLRRAISFYSTIQAHDGHWPA ESAGPLFFLPPLVIALYITGALNVVLSPEHQKESKRYIYNHQNEDGGWGFHIEGHSTVFG SVLNYIALRLLGEQVDDREDMAMARGRKWILDHGGAVGIPSWGKFWLAVLGVYEWAGCNP MPPEFWLLPDFFPIHPGKMLCYCRLVYMPMSYLYGKRFVGKITKLVQSLRQELYIEPYHE INWNKARNTCAKEDLYYPHPLVQDMLWGFLHNVAEPILARWPFSTLREKALKVAIEHIHY EDEASRYLCIGCVEKVLCLIAIWVEDPNSEAYQ…	ATGTGGAGATTGAAGATTGCGGAAGGAGATGGAGCAGCTGGTAGGGGGCTGCTGACTACGACAAATAACCACGTCGGCCGACAACACTGGGAATTTGATC CAGACGCCGGAACCAATGAAGAAAGAGCTGAGGTCGAAAGGGCTCGCCATTACTTCAAACAAAATCGCTTCACTTTCAAACAGAGTTCTGATTTACTCAT GCGTTTCCAACTTACAAAGGAGAGACCATGTGGCCCAATTCCCTCAGCAATAAAGCTCAAGGAAACAGAGGAAATAACAGAGGAAGCTGTAACAACAACA CTGAGAAGGGCCATCAGCTTCTACTCAACAATTCAAGCCCATGATGGTCACTGGCCTGCTGAATCTGCTGGCCCCTTGTTCTTTCTCCCTCCTTTG…
GWHTARYT039323	MWKLRIAEGNGSMLTTTNNHVGRQHWEFDPNAGTDEERAEVEKLRLHFKQNRFTVRQSSD LLMRMQLRKENLCGPIPAAIKVQETEDVTEEAVTTTLRRAISFYSTIQAHDGHWPAESAG PLFFIPPLVIALYITGALNTVLNPEYQKESKRYLYNHQNEDGGWGFHIEGDSTAFGTILN YIALRLLGEGREDGEDMAMTRGRKWILDRGGAVGIPSWGKFWLSVLGVYEWAGCNPMPPE FWLIPESFPINPGQMLSYCRVVYMPMSYLYGKRFVGKITELVQSLRQELYTKPYHEIDWN AARNTCAREDLYYPHPLVQDMLWTLLYKVGEPLMSHWPFSKLREKALKMSIEHVHYEDIG SRHLTIGCVEKVICILAVWVEDPNSEAYKRHLA…	ATGTGGAAGCTGAGGATTGCGGAAGGAAATGGGTCGATGCTGACAACAACTAATAATCACGTCGGCCGACAGCACTGGGAGTTCGACCCCAATGCCGGAA CCGACGAAGAAAGAGCTGAGGTTGAGAAGCTTCGCCTTCACTTCAAACAAAATCGCTTCACTGTTAGGCAGAGTTCTGACTTGCTCATGCGTATGCAACT TAGAAAGGAGAACTTGTGTGGGCCAATTCCAGCAGCAATAAAAGTCCAAGAAACAGAGGACGTAACAGAGGAAGCTGTGACAACTACTCTAAGAAGGGCC ATCAGCTTCTACTCAACCATTCAAGCCCATGATGGCCACTGGCCTGCCGAATCTGCTGGGCCTCTATTCTTTATCCCTCCTTTGGTTATAGCTCTG…
GWHTARYT039333	MWKLKFAEGRSPWLRSLNDHVGRQFWEFDPKLGSPEELAEIERVRRNFRDNRFEKKHSSD LLMRIQLTKENSGTVLLPKVKLKDTEDITEDNVVNTLRRAMSFHSTIQAHDGHFPGDYGG PMFLLPGLVITLSITGALNAVLSKEHKSEMCRYLYNHQNEDGGWGLHIEGPSTMFGSALN YVTLRLLGEGANDGEGAMEKGRNWILDHGGATAITSWGKMWLSVLGAFEWSGNNPLPPEV WITPYSLPFHPGRMWCHCRMVYLPMSYLYGKRFVGPITPTVLALRKELFTVPYHEIDWNK ARNLCAKEDLYYPHPLIQNILWATLDKFVEPILMRWPGKKLREKALSSVIEHIHYEDENT RYLCIGPVNKVLNMLCCWVEDPNSEAFKLHLPR…	ATGTGGAAGCTGAAGTTCGCCGAAGGCAGGAGCCCGTGGCTCCGTTCTCTTAACGATCACGTCGGCAGGCAATTCTGGGAGTTCGATCCTAAACTCGGAT CGCCGGAGGAACTGGCGGAGATTGAGCGAGTTCGCCGGAACTTTCGTGACAATCGGTTCGAGAAAAAGCACAGCTCAGATCTGCTCATGCGCATTCAGCT AACTAAGGAGAATTCAGGCACTGTTCTCCTCCCAAAAGTCAAGCTAAAAGATACAGAAGATATTACAGAGGATAATGTAGTGAACACATTAAGAAGAGCT ATGAGTTTCCATTCAACTATCCAGGCTCATGATGGACATTTTCCAGGAGATTATGGAGGTCCTATGTTTCTATTGCCTGGTTTGGTTATTACTCTA…
GWHTARYT039335	MQNIDGGWGLHIEGHSTMFSTVLNYVSLRLLGKSINNGALARARIWIISHGGATCVPSWG KFWLSVLGVYEWSGNNPLPPEIWLLPYFLPLHPGRMWCHTRMVYLPMSYLYAKRFVGPIN STILSLRIELYSLPYHRIDWDMARNQCAKEDLYYPHPAVQDIMWGGLHKVAEPLLKQWPF SKLRSKALDTVMKHIHHEDENTSYICIGPVNKVLNMVCCWVEDPKSMANRLHLSRVKDYL WVAEDGMKMQGYNGSQLWDAAFAVQAILATNLVDEYGSMLKKAHEFIKISQVREDSSNNL NSWYRHISKGGWPFSTPDNGWPVSDCTAEGLKAVLLLSQMPFDIVGEAMAPDQLYDAVNL ILSLQNTTGGFASYELTRSYKFLEVINPAETFG…	ATGCAGAATATTGATGGAGGCTGGGGATTACACATAGAGGGGCACAGCACAATGTTTTCTACAGTTCTGAACTATGTCAGCCTAAGATTGCTTGGAAAAA GTATCAATAATGGAGCTTTGGCCAGAGCAAGAATTTGGATTATCAGTCATGGTGGAGCCACATGCGTACCATCATGGGGAAAATTTTGGCTCTCGGTTCT TGGGGTATATGAGTGGAGTGGCAACAATCCTCTACCACCAGAGATATGGCTTCTTCCCTACTTTCTTCCTTTGCACCCAGGACGCATGTGGTGTCACACT CGAATGGTTTACCTGCCTATGTCATACTTATATGCAAAGAGGTTTGTAGGGCCGATCAATTCCACTATTCTATCACTAAGGATAGAGCTCTACTCA…
