# Supplementary material for: Genome-wide identification and expression analysis of the OSC gene family in Platycodon grandiflorus
Source: PeerJ. 2024 Oct 28;12:e18322. doi: 10.7717/peerj.18322 (PMC11639181; doi:10.7717/peerj.18322)
Supplement: Table S4 [file peerj-12-18322-s004.xlsx]

## Sheet: Sheet1
Table S4.The information of cis-acting elements on the promoter
Transcript Name	Base position(5')	Base position(3')	Name of cis-acting elements
PGRA_01400	1159	1133	auxin-responsive element
PGRA_09213	863	837	auxin-responsive element
PGRA_12121	41	15	auxin-responsive element
PGRA_12121	774	748	auxin-responsive element
PGRA_07650	1852	1825	auxin-responsive element
PGRA_21798	1786	1759	auxin-responsive element
PGRA_07650	1725	1696	cis-acting element involved in defense and stress responsiveness
PGRA_09213	417	388	cis-acting element involved in defense and stress responsiveness
PGRA_10179	1703	1674	cis-acting element involved in defense and stress responsiveness
PGRA_10657	1977	1948	cis-acting element involved in defense and stress responsiveness
PGRA_12121	1056	1027	cis-acting element involved in defense and stress responsiveness
PGRA_14049	179	150	cis-acting element involved in defense and stress responsiveness
PGRA_00628	1762	1735	cis-acting element involved in gibberellin-responsiveness
PGRA_07489	1686	1659	cis-acting element involved in gibberellin-responsiveness
PGRA_09213	868	841	cis-acting element involved in gibberellin-responsiveness
PGRA_12121	1518	1491	cis-acting element involved in gibberellin-responsiveness
PGRA_14049	1753	1726	cis-acting element involved in gibberellin-responsiveness
PGRA_00290	1870	1844	cis-acting element involved in low-temperature responsiveness
PGRA_07650	517	491	cis-acting element involved in low-temperature responsiveness
PGRA_07650	1278	1252	cis-acting element involved in low-temperature responsiveness
PGRA_10179	751	725	cis-acting element involved in low-temperature responsiveness
PGRA_10657	289	263	cis-acting element involved in low-temperature responsiveness
PGRA_11512	89	63	cis-acting element involved in low-temperature responsiveness
PGRA_11512	297	271	cis-acting element involved in low-temperature responsiveness
PGRA_14049	1523	1497	cis-acting element involved in low-temperature responsiveness
PGRA_00290	1020	991	cis-acting element involved in salicylic acid responsiveness
PGRA_00290	1050	1021	cis-acting element involved in salicylic acid responsiveness
PGRA_00290	1403	1374	cis-acting element involved in salicylic acid responsiveness
PGRA_07489	655	626	cis-acting element involved in salicylic acid responsiveness
PGRA_07489	1531	1502	cis-acting element involved in salicylic acid responsiveness
PGRA_07489	1749	1720	cis-acting element involved in salicylic acid responsiveness
PGRA_07650	25	-4	cis-acting element involved in salicylic acid responsiveness
PGRA_07650	609	580	cis-acting element involved in salicylic acid responsiveness
PGRA_08913	986	957	cis-acting element involved in salicylic acid responsiveness
PGRA_09445	7	-22	cis-acting element involved in salicylic acid responsiveness
PGRA_09445	1556	1527	cis-acting element involved in salicylic acid responsiveness
PGRA_10657	1703	1674	cis-acting element involved in salicylic acid responsiveness
PGRA_11512	1680	1651	cis-acting element involved in salicylic acid responsiveness
PGRA_14049	814	785	cis-acting element involved in salicylic acid responsiveness
PGRA_00189	753	728	cis-acting element involved in the abscisic acid responsiveness
PGRA_00628	1797	1772	cis-acting element involved in the abscisic acid responsiveness
PGRA_01400	956	931	cis-acting element involved in the abscisic acid responsiveness
PGRA_07489	1435	1410	cis-acting element involved in the abscisic acid responsiveness
PGRA_07650	1340	1315	cis-acting element involved in the abscisic acid responsiveness
PGRA_08913	210	185	cis-acting element involved in the abscisic acid responsiveness
PGRA_09445	743	718	cis-acting element involved in the abscisic acid responsiveness
PGRA_10179	1575	1549	cis-acting element involved in the abscisic acid responsiveness
PGRA_10179	1576	1551	cis-acting element involved in the abscisic acid responsiveness
PGRA_10657	85	60	cis-acting element involved in the abscisic acid responsiveness
PGRA_10657	1627	1602	cis-acting element involved in the abscisic acid responsiveness
PGRA_10657	1664	1639	cis-acting element involved in the abscisic acid responsiveness
PGRA_11512	707	681	cis-acting element involved in the abscisic acid responsiveness
PGRA_11512	708	683	cis-acting element involved in the abscisic acid responsiveness
PGRA_11512	750	725	cis-acting element involved in the abscisic acid responsiveness
PGRA_12121	1183	1153	cis-acting element involved in the abscisic acid responsiveness
PGRA_12121	1186	1158	cis-acting element involved in the abscisic acid responsiveness
PGRA_12121	1187	1162	cis-acting element involved in the abscisic acid responsiveness
PGRA_14049	804	779	cis-acting element involved in the abscisic acid responsiveness
PGRA_21798	1576	1551	cis-acting element involved in the abscisic acid responsiveness
PGRA_21798	1809	1783	cis-acting element involved in the abscisic acid responsiveness
PGRA_21798	1810	1785	cis-acting element involved in the abscisic acid responsiveness
PGRA_00290	1866	1840	cis-acting regulatory element essential for the anaerobic induction
PGRA_01400	295	269	cis-acting regulatory element essential for the anaerobic induction
PGRA_01400	1780	1754	cis-acting regulatory element essential for the anaerobic induction
PGRA_07489	1290	1264	cis-acting regulatory element essential for the anaerobic induction
PGRA_07650	415	389	cis-acting regulatory element essential for the anaerobic induction
PGRA_07650	532	506	cis-acting regulatory element essential for the anaerobic induction
PGRA_08913	1578	1552	cis-acting regulatory element essential for the anaerobic induction
PGRA_09213	999	973	cis-acting regulatory element essential for the anaerobic induction
PGRA_09445	14	-12	cis-acting regulatory element essential for the anaerobic induction
PGRA_09445	377	351	cis-acting regulatory element essential for the anaerobic induction
PGRA_09445	1170	1144	cis-acting regulatory element essential for the anaerobic induction
PGRA_10179	51	25	cis-acting regulatory element essential for the anaerobic induction
PGRA_10179	1481	1455	cis-acting regulatory element essential for the anaerobic induction
PGRA_10179	1532	1506	cis-acting regulatory element essential for the anaerobic induction
PGRA_10657	222	196	cis-acting regulatory element essential for the anaerobic induction
PGRA_10657	436	410	cis-acting regulatory element essential for the anaerobic induction
PGRA_10657	1834	1808	cis-acting regulatory element essential for the anaerobic induction
PGRA_12121	233	207	cis-acting regulatory element essential for the anaerobic induction
PGRA_12121	729	703	cis-acting regulatory element essential for the anaerobic induction
PGRA_09445	55	26	cis-acting regulatory element involved in circadian control
PGRA_14049	1244	1215	cis-acting regulatory element involved in circadian control
PGRA_00189	752	726	cis-acting regulatory element involved in light responsiveness
PGRA_00189	288	262	cis-acting regulatory element involved in light responsiveness
PGRA_00628	1797	1771	cis-acting regulatory element involved in light responsiveness
PGRA_01400	954	925	cis-acting regulatory element involved in light responsiveness
PGRA_01400	955	929	cis-acting regulatory element involved in light responsiveness
PGRA_07489	1435	1409	cis-acting regulatory element involved in light responsiveness
PGRA_07650	439	413	cis-acting regulatory element involved in light responsiveness
PGRA_07650	782	756	cis-acting regulatory element involved in light responsiveness
PGRA_07650	1367	1341	cis-acting regulatory element involved in light responsiveness
PGRA_07650	1339	1313	cis-acting regulatory element involved in light responsiveness
PGRA_08913	210	184	cis-acting regulatory element involved in light responsiveness
PGRA_09445	743	717	cis-acting regulatory element involved in light responsiveness
PGRA_10179	1575	1549	cis-acting regulatory element involved in light responsiveness
PGRA_10179	1575	1549	cis-acting regulatory element involved in light responsiveness
PGRA_10657	1626	1600	cis-acting regulatory element involved in light responsiveness
PGRA_10657	1664	1638	cis-acting regulatory element involved in light responsiveness
PGRA_10657	84	58	cis-acting regulatory element involved in light responsiveness
PGRA_11512	705	676	cis-acting regulatory element involved in light responsiveness
PGRA_11512	707	681	cis-acting regulatory element involved in light responsiveness
PGRA_11512	749	723	cis-acting regulatory element involved in light responsiveness
PGRA_11512	707	681	cis-acting regulatory element involved in light responsiveness
PGRA_12121	1186	1160	cis-acting regulatory element involved in light responsiveness
PGRA_14049	804	778	cis-acting regulatory element involved in light responsiveness
PGRA_14049	1594	1565	cis-acting regulatory element involved in light responsiveness
PGRA_21798	1576	1550	cis-acting regulatory element involved in light responsiveness
PGRA_21798	1808	1780	cis-acting regulatory element involved in light responsiveness
PGRA_21798	1809	1783	cis-acting regulatory element involved in light responsiveness
PGRA_21798	1809	1783	cis-acting regulatory element involved in light responsiveness
PGRA_00189	582	557	cis-acting regulatory element involved in the MeJA-responsiveness
PGRA_07489	1091	1066	cis-acting regulatory element involved in the MeJA-responsiveness
PGRA_07650	823	798	cis-acting regulatory element involved in the MeJA-responsiveness
PGRA_08913	925	900	cis-acting regulatory element involved in the MeJA-responsiveness
PGRA_08913	1382	1357	cis-acting regulatory element involved in the MeJA-responsiveness
PGRA_09213	1465	1440	cis-acting regulatory element involved in the MeJA-responsiveness
PGRA_09445	124	99	cis-acting regulatory element involved in the MeJA-responsiveness
PGRA_10179	1080	1055	cis-acting regulatory element involved in the MeJA-responsiveness
PGRA_10657	1666	1641	cis-acting regulatory element involved in the MeJA-responsiveness
PGRA_11512	124	99	cis-acting regulatory element involved in the MeJA-responsiveness
PGRA_11512	139	114	cis-acting regulatory element involved in the MeJA-responsiveness
PGRA_11512	145	120	cis-acting regulatory element involved in the MeJA-responsiveness
PGRA_00189	582	557	cis-acting regulatory element involved in the MeJA-responsiveness
PGRA_07489	1091	1066	cis-acting regulatory element involved in the MeJA-responsiveness
PGRA_07650	823	798	cis-acting regulatory element involved in the MeJA-responsiveness
PGRA_08913	925	900	cis-acting regulatory element involved in the MeJA-responsiveness
PGRA_08913	1382	1357	cis-acting regulatory element involved in the MeJA-responsiveness
PGRA_09213	1465	1440	cis-acting regulatory element involved in the MeJA-responsiveness
PGRA_09445	124	99	cis-acting regulatory element involved in the MeJA-responsiveness
PGRA_10179	1080	1055	cis-acting regulatory element involved in the MeJA-responsiveness
PGRA_10657	1666	1641	cis-acting regulatory element involved in the MeJA-responsiveness
PGRA_11512	124	99	cis-acting regulatory element involved in the MeJA-responsiveness
PGRA_11512	139	114	cis-acting regulatory element involved in the MeJA-responsiveness
PGRA_11512	145	120	cis-acting regulatory element involved in the MeJA-responsiveness
PGRA_00628	1180	1151	cis-acting regulatory element involved in zein metabolism regulation
PGRA_01400	1276	1248	cis-acting regulatory element involved in zein metabolism regulation
PGRA_10657	306	277	cis-acting regulatory element involved in zein metabolism regulation
PGRA_11512	1805	1776	cis-acting regulatory element involved in zein metabolism regulation
PGRA_00628	757	731	cis-acting regulatory element related to meristem expression
PGRA_01400	980	954	cis-acting regulatory element related to meristem expression
PGRA_09445	1566	1540	cis-acting regulatory element related to meristem expression
PGRA_14049	1343	1317	cis-acting regulatory element related to meristem expression
PGRA_21798	69	43	cis-acting regulatory element related to meristem expression
PGRA_10657	1076	1049	cis-regulatory element involved in endosperm expression
PGRA_00290	1234	1208	enhancer-like element involved in anoxic specific inducibility
PGRA_09445	860	834	enhancer-like element involved in anoxic specific inducibility
PGRA_10179	1379	1353	enhancer-like element involved in anoxic specific inducibility
PGRA_07489	1913	1886	gibberellin-responsive element
PGRA_08913	1912	1885	gibberellin-responsive element
PGRA_09445	1918	1891	gibberellin-responsive element
PGRA_00189	705	678	gibberellin-responsive element
PGRA_09213	757	730	gibberellin-responsive element
PGRA_09445	485	458	gibberellin-responsive element
PGRA_09445	1675	1648	gibberellin-responsive element
PGRA_10179	1596	1569	gibberellin-responsive element
PGRA_00189	1605	1579	MYB binding site involved in drought-inducibility
PGRA_00189	1774	1748	MYB binding site involved in drought-inducibility
PGRA_00290	1501	1475	MYB binding site involved in drought-inducibility
PGRA_00290	1704	1678	MYB binding site involved in drought-inducibility
PGRA_01400	1164	1138	MYB binding site involved in drought-inducibility
PGRA_01400	1214	1188	MYB binding site involved in drought-inducibility
PGRA_07650	502	476	MYB binding site involved in drought-inducibility
PGRA_10179	926	900	MYB binding site involved in drought-inducibility
PGRA_12121	1957	1931	MYB binding site involved in drought-inducibility
